# Supplementary material
Source: PubMed Central journal article supplement (PMC2292772)
Supplement: cmaj_178_9_1171__1.pdf [file cmaj_178_9_1171__1.pdf]

## Recherche

## Doit-on procéder à l'intubation sur le terrain?

Daniel P. Davis MD

**D**e tous les problèmes de santé, ce sont les blessures résultant de traumatismes qui donnent lieu au plus grand nombre d'années de vie productive perdues et elles représentent la principale cause de mortalité chez les jeunes. Malgré l'importance des traumatismes en santé publique, les interventions de réanimation précoces ont enregistré peu de progrès au cours des dernières décennies. Dans le présent numéro, Stiell et ses collaborateurs<sup>1</sup> nous proposent une importante enquête sur le lien entre les soins pré-hospitaliers avancés et l'issue des blessures d'origine traumatique<sup>1</sup>. Ils ont utilisé un modèle avant-après pour retracer l'évolution de la survie après la mise en œuvre d'un programme avancé de réanimation. Leur analyse fait partie du projet OPALS (pour Ontario Prehospital Advanced Life Support), qui est peut-être la plus importante et complète enquête réalisée à ce jour sur les soins de réanimation préhospitaliers.

Les mesures avancées de maintien des fonctions vitales comportent, entre autres avantages théoriques, une évaluation poussée, l'intubation et l'administration de liquides ou de médicaments par voie intraveineuse. L'analyse OPALS préliminaire n'a toutefois pas permis de confirmer un lien entre l'application de techniques de réanimation avancées chez les patients en arrêt cardiaque et un avantage sur le plan de la survie<sup>2</sup>. La seconde analyse a fait état d'une amélioration de la survie associée à l'application d'un programme de réanimation avancé chez des patients en détresse respiratoire avant leur arrivée à l'hôpital<sup>3</sup>. Dans la présente analyse sur des patients polytraumatisés, Stiell et ses collaborateurs n'ont noté aucun changement significatif quant à la survie globale jusqu'à l'arrivée à l'hôpital après l'application du programme de réanimation avancé (82 % chez les 1373 patients de la phase de réanimation de base, contre 81 % chez les 1494 patients de la phase de réanimation avancée); cette conclusion est étayée par l'analyse de régression logistique réalisée par les auteurs. En outre, les analyses de sous-groupes prévues par les auteurs ont révélé une augmentation significative de la mortalité durant la phase de réanimation avancée chez les patients présumés victimes d'un traumatisme crânien, défini par un score de 3 à 8 à l'échelle de Glasgow (40 % avec la réanimation de base, contre 49 % avec la réanimation avancée).

Stiell et ses collaborateurs avancent l'hypothèse selon laquelle l'intubation endotrachéale et la ventilation à pression positive propres aux mesures de réanimation avancées peuvent en partie expliquer l'augmentation de la mortalité. Faudrait-il de ce fait retrancher des actes médicaux délégués aux ambulanciers paramédicaux l'intubation préhospitalière des patients polytraumatisés?

Bien qu'en principe l'intubation s'impose d'emblée en médecine d'urgence si le score à l'échelle de Glasgow se situe

## Points saillants

- Le projet OPALS (pour Ontario Prehospital Advanced Life Support) est une enquête complète sur la réanimation préhospitalière auprès de différentes populations de patients.
- Lors de la plus récente étude OPALS, les techniques de réanimation avancées n'ont pas amélioré le pronostic des patients atteints de traumatismes.
- L'intubation endotrachéale et la ventilation à pression positive, surtout chez les patients victimes de graves traumatismes crâniens, pourraient faire plus de mal que de bien.
- On ignore quels éléments de la complexe prise en charge de la fonction respiratoire chez les patients vulnérables il faut modifier ou appliquer uniquement dans un contexte hospitalier plus encadré.

à 8, les preuves qui appuient une assistance respiratoire aussi vigoureuse laissent à désirer. Des études antérieures menées chez l'animal et des résultats d'autopsies ont révélé que la dysfonction respiratoire est un important médiateur de la morbidité et de la mortalité chez les patients victimes d'un traumatisme crânien<sup>4</sup>. Des analyses d'observation déterminantes portant sur d'imposants registres de patients polytraumatisés, comme celle de Chesnut et ses collaborateurs<sup>5</sup> en 1993, ont confirmé un lien entre l'hypoxémie précoce et la mortalité par suite de traumatismes crâniens. Rien n'a toutefois confirmé que de tels liens justifiaient l'intubation précoce en présence d'un coma post-traumatique.

Plusieurs auteurs ont utilisé les données de tels registres pour analyser la relation entre l'intubation préhospitalière et l'issue d'un traumatisme crânien. Eckstein et ses collaborateurs<sup>6</sup> ont observé un accroissement de la mortalité chez les patients atteints de graves traumatismes crâniens qui avaient subi une intubation préhospitalière, comparativement à des patients qui avaient été ventilés par masque et ballon d'anesthésie avant d'être transportés dans un centre urbain de traumatologie. Murray et ses collaborateurs<sup>7</sup> ont pour leur part analysé des données relatives à des victimes de graves traumatismes crâniens qui ont été hospitalisées dans 13 centres de traumatologie différents du comté de Los Angeles en Californie et ont observé un accroissement de la mortalité chez les sujets que l'on avait tenté d'intuber, avec succès ou non. D'autres auteurs ont depuis signalé des résultats semblables, même après ajustement pour tenir compte de covariables multiples dans le cadre de modèles de régression<sup>8,9</sup>. Le seul essai contrôlé prospectif à avoir analysé l'effet de l'intubation préhospitalière

Daniel Davis est attaché au département de médecine d'urgence de l'Université de la Californie à San Diego.

a été réalisé auprès d'une population pédiatrique. Gausche et ses collaborateurs<sup>10</sup> ont utilisé un modèle « 1 jour sur 2 » pour comparer l'intubation à la ventilation par masque et ballon d'anesthésie dans la prise en charge préhospitalière de patients pédiatriques nécessitant une assistance respiratoire. Ils n'ont observé aucune différence statistiquement significative quant à la survie entre les 2 cohortes, malgré la relative petite taille de la série de patients victimes de traumatismes crâniens. Les données de notre système, à San Diego, ont montré un lien entre l'intubation précoce et l'accroissement de la mortalité<sup>11</sup>. On a pu appliquer cette observation à tous les patients victimes d'un traumatisme crânien de modéré à grave, défini par un score de 3 ou plus à l'Abbreviated Injury Score, mais l'analyse du réseau neuronal de même qu'une approche modifiée au calcul du score d'évaluation de la gravité des traumatismes et des blessures (Trauma and Injury Severity Score) ont fait ressortir un possible avantage associé à l'intubation précoce chez un sous-groupe de patients atteints de traumatismes crâniens plus graves<sup>11</sup>.

La constance des résultats de ces études est probante et donne à croire que l'intubation précoce exercerait un effet négatif sur le pronostic des patients atteints de traumatismes crâniens. Toutefois, chacune de ces études comportait probablement un certain biais de sélection, malgré leurs méthodologies rigoureuses permettant l'ajustement pour tenir compte de covariables multiples. Tout patient que l'on peut intuber sans prémédication présente fort probablement une atteinte neurologique gravissime et difficile à quantifier avec précision au moyen de l'échelle de Glasgow ou d'une échelle abrégée des traumatismes. L'étude San Diego Paramedic Rapid Sequence Intubation Trial avait pour but d'analyser l'effet des bloquants neuromusculaires sur le pronostic des patients atteints de graves traumatismes crâniens qui ne pouvaient subir d'intubation sans prémédication, ce qui, en théorie, éliminait tout biais de sélection. Bien que notre utilisation des témoins historiques puisse avoir introduit un certain biais de sélection, plusieurs approches analytiques ont indiqué un accroissement de la mortalité lié à l'intubation rapide par les ambulanciers paramédicaux<sup>12</sup>. D'autres essais d'analyse du recours aux bloquants neuromusculaires par les ambulanciers ont plutôt révélé un avantage potentiel, mais ces études ont été desservies par des protocoles d'intervention non officiels et des sujets témoins inadéquats<sup>13,14</sup>.

## Impact physiologique des complications respiratoires précoces

Pour comprendre les écarts apparents en ce qui a trait au rôle de l'intubation, avec ou sans prémédication, lors de la prise en charge immédiate d'un traumatisme crânien, il est utile de tenir compte de l'impact physiologique des complications respiratoires précoces et de leur influence sur la lésion cérébrale. Bien que la dysfonction respiratoire précoce accompagne sans contredit un traumatisme crânien grave, on ignore si les services médicaux d'urgence peuvent procéder à l'intubation et inverser l'état d'hypoxémie avant la survenue d'une atteinte hypoxémique importante<sup>4</sup>. De plus, les modalités non effractives visant à améliorer l'oxygénation pour-

raient se révéler aussi efficaces que l'intubation chez la plupart des patients<sup>15</sup>. De même, un traumatisme crânien grave risque fort d'entraîner l'abolition des réflexes de protection respiratoire. Par contre, le cas échéant, l'aspiration semble survenir immédiatement après le traumatisme, avant l'arrivée des ambulanciers paramédicaux et selon des preuves récentes, la présence du tube endotrachéal lui-même pourrait accroître le risque de pneumonie d'aspiration<sup>16</sup>. En outre, le simple fait de procéder à une laryngoscopie pourrait faire augmenter la pression intracrânienne, elle-même susceptible d'exacerber la lésion primaire<sup>17</sup>.

Notre incapacité d'observer un avantage associé à l'intubation précoce en présence de traumatisme crânien grave, s'explique peut-être le plus probablement par les stratégies de ventilation incorrectes appliquées par les ambulanciers. Plusieurs analyses secondaires dérivées du San Diego Paramedic Rapid Sequence Intubation Trial mentionnent que l'hyperventilation, définie par l'hypocapnie, a été un médiateur important de l'issue négative associée à l'emploi de bloquants neuromusculaires par les ambulanciers<sup>18</sup>. Une analyse subséquente des données tirées du San Diego Trauma Registry, plus volumineux, a confirmé le lien entre hypocapnie et accroissement de la mortalité<sup>19</sup>. À noter, ce lien s'observait uniquement chez les patients que l'on a intubés, et après ajustement pour tenir compte de plusieurs covariables, l'hypocapnie n'a pas été associée à un accroissement de la mortalité chez les patients qui respiraient spontanément. Warner et ses collaborateurs<sup>20</sup> ont depuis confirmé ces résultats dans leur propre système. Stiell et ses collaborateurs n'avaient pas accès à des données sur la ventilation pour analyser ce lien, mais une preuve substantielle d'hyperventilation s'observait fort probablement après l'application des protocoles de réanimation avancés<sup>1</sup>.

Une autre explication, moins bien établie, mais tout aussi concluante pour comprendre l'effet négatif apparent de l'intubation sur l'issue d'un traumatisme crânien est l'impact potentiellement nuisible des taux d'oxygène supérieurs à la normale. Une récente analyse des données provenant de notre registre de traumatologie a révélé un lien entre l'hypoxémie et l'hyperoxémie et l'accroissement de la mortalité (données non publiées). Ce lien s'est révélé indépendant de l'intubation et de la ventilation, bien que la pression partielle de l'oxygène à l'arrivée ait été plus élevée chez les patients intubés que chez les patients non intubés. L'accès à un équipement plus sophistiqué, par exemple, à des appareils de capnométrie quantitative ou à de respirateurs mécaniques, pourrait permettre d'éviter l'hypocapnie ou l'hyperoxémie. En dernier lieu, une formation insuffisante et le manque d'expérience pratique due à la relative rareté des intubations par les ambulanciers pourraient également expliquer l'effet négatif manifeste sur la survie. Il reste à déterminer l'influence de ces facteurs sur le rendement optimum de la technique ou sur la fréquence des atteintes physiologiques, comme l'hyperventilation.

## La voie de l'avenir

Bien que l'article de Stiell et ses collaborateurs remette en question nos théories quant à la réanimation, je mettrais les

lecteurs en garde contre toute conclusion selon laquelle les principes de réanimation avancés en général ou l'intubation préhospitalière en particulier ne comportent aucun avantage ou sont essentiellement nuisibles. Nous devons plutôt tenter de mieux comprendre les mécanismes qui expliquent de tels liens et travailler à l'optimisation du rendement avant de restreindre les actes médicaux délégués aux ambulanciers. Il y aurait peut-être moyen d'améliorer le rendement de la technique en formant mieux les ambulanciers ou limitant la pratique de l'intubation à ceux qui sont expérimentés pour éliminer les effets négatifs tout en permettant aux patients de bénéficier d'une assistance respiratoire éprouvée et d'une meilleure oxygénation. Une meilleure évaluation des patients qui doivent être intubés avant leur arrivée à l'hôpital pourrait aussi contribuer à éviter une exposition induite à une intervention potentiellement nuisible et l'accès à des appareils améliorés pourrait contribuer à éviter des complications comme la désaturation ou l'hyperventilation.

**Conflit d'intérêts :** Aucun déclaré.

## RÉFÉRENCES

1. Stiell IG, Nesbitt LP, Pickett W et coll., The OPALS Major Trauma Study: impact of advanced life-support on survival and morbidity. *CMAJ* 2008;178:1141-52.
2. Stiell IG, Wells GA, Field B et coll., Advanced cardiac life support in out-of-hospital cardiac arrest. *N Engl J Med* 2004;351:647-56.
3. Stiell IG, Spaite DW, Field B et coll., Advanced life support for out-of-hospital respiratory distress. *N Engl J Med* 2007;356:2156-64.
4. Atkinson JLD. The neglected prehospital phase of head injury: apnea and catecholamine surge. *Mayo Clin Proc* 2000;75:37-47.
5. Chesnut RM, Marshall LF, Klauber MR et coll., The role of secondary brain injury in determining outcome from severe head injury. *J Trauma* 1993;34:216-22.
6. Eckstein M, Chan L, Schneir A et coll., Effect of prehospital advanced life support on outcomes of major trauma patients. *J Trauma* 2000;48:643-8.
7. Murray JA, Demetriades D, Berne TV et coll., Prehospital intubation in patients with severe head injury. *J Trauma* 2000;49:1065-70.
8. Wang HE, Peitzman AD, Cassidy LD et coll., Out-of-hospital endotracheal intubation and outcome after traumatic brain injury. *Ann Emerg Med* 2004;44:439-50.
9. Bochicchio GV, Ilahi O, Joshi M et coll., Endotracheal intubation in the field does not improve outcome in trauma patients who present without lethal traumatic brain injury. *J Trauma* 2003;54:307-11.
10. Gausche M, Lewis RJ, Stratton SJ et coll., Effect of out-of-hospital pediatric endotracheal intubation on survival and neurological outcome: a controlled clinical trial. *JAMA* 2000;283:783-90.
11. Davis DP, Peay J, Sise MJ et coll., The impact of prehospital endotracheal intubation on outcome in moderate-to-severe traumatic brain injury. *J Trauma* 2005;58:933-9.
12. Davis DP, Hoyt DB, Ochs M et coll., The effect of paramedic rapid sequence intubation on outcome in patients with severe traumatic brain injury. *J Trauma* 2003;54:444-53.
13. Domeier RM, Frederiksen SM, Chudnofsky CF et coll., The effect of paramedic rapid-sequence intubation on outcome in trauma patients [résumé]. *Prehosp Emerg Care* 2005;9:114-5.
14. Bulger EM, Copass MK, Sabath DR et coll., The use of neuromuscular blocking agents to facilitate prehospital intubation does not impair outcome after traumatic brain injury. *J Trauma* 2005;58:718-24.
15. Davis DP, Fisher R, Buono C et coll., Predictors of intubation success and therapeutic value of paramedic airway management in a large, urban EMS system. *Prehosp Emerg Care* 2006;10:356-62.
16. Vadeboncoeur TF, Davis DP, Ochs M et coll., The ability of paramedics to predict aspiration in patients undergoing prehospital rapid sequence intubation. *J Emerg Med* 2006;30:131-6.
17. Bozeman WP, Idris AH. Intracranial pressure changes during rapid sequence intubation: a swine model. *J Trauma* 2005;58:278-83.
18. Davis DP, Dunford JV, Hoyt DB et coll., The impact of hypoxia and hyperventilation on outcome following paramedic rapid sequence intubation of patients with severe traumatic brain injury. *J Trauma* 2004;57:1-10.
19. Davis DP, Idris AH, Sise MJ et coll., Ventilation and outcome in patients with moderate-to-severe traumatic brain injury. *Crit Care Med* 2006;34:1202-8.
20. Warner KJ, Cuschieri J, Copass MK et coll., The impact of prehospital ventilation on outcome after severe traumatic brain injury. *J Trauma* 2007;62:1330-8.

**Correspondance :** Dr Daniel P. Davis, Department of Emergency Medicine, University of California San Diego, 8676-200 W Arbor Dr., San Diego CA 92007, téléc. : 619 543-3115; davismd@cox.net
